# Supplementary material
Source: Springer Nature journal article supplement (https://www.springermedizin.de/resource/supplementary/13075_2009_2739_MOESM2_ESM.pdf/9692776)

Anti-TNF $\alpha$ 

Controls

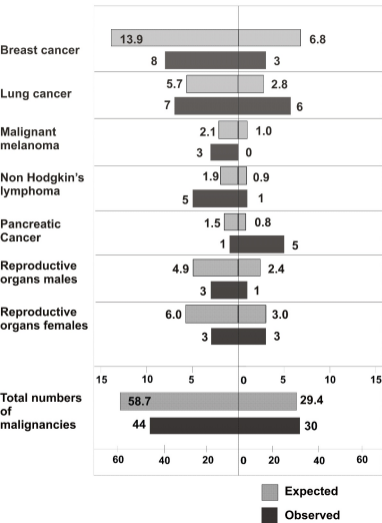

Supplement: MOESM2 [file 9692776]
